# Supplementary material for: Effectiveness and Economic Viability of Johne's Disease (Paratuberculosis) Control Practices in Dairy Herds
Source: PubMed Central journal article supplement (PMC7843527; doi:10.3389/fvets.2020.614727), 2021-01-15
Supplement: Data_Sheet_1.pdf [file Data_Sheet_1.pdf]

## Supplementary Files

### **Effectiveness and economic viability of Johne's disease (paratuberculosis) control practices in dairy herds**

***Philip Rasmussen,<sup>1</sup> Herman W. Barkema,<sup>2</sup> David C. Hall<sup>1\*</sup>***

*<sup>1</sup> Department of Ecosystem and Public Health, University of Calgary, Calgary, AB, Canada, <sup>2</sup> Department of Production Animal Health, University of Calgary, Calgary, AB, Canada*

**Table S1<sup>1</sup> | General input variables used in Markov chain simulations of the MAP (*Mycobacterium avium* subsp. *paratuberculosis*) -positive and control practice herd models.**

| <b>Variable</b>                                | <b>Mean value</b> | <b>Unit</b> | <b>Source</b> |
|------------------------------------------------|-------------------|-------------|---------------|
| Effect of infection on production              | 5.90              | %           | (1)           |
| Replacement pool                               | 5000.00           | cows        | Assumed       |
| Replacement cost (labor)                       | 2.00              | hours       | Assumed       |
| Bacteria shed – Light shedders <sup>1</sup>    | 5.00              | CFU         | (2,3)         |
| Bacteria shed – Moderate shedders <sup>1</sup> | 25.00             | CFU         | (2,3)         |
| Bacteria shed – Heavy shedders <sup>1</sup>    | 50.00             | CFU         | (2,3)         |
| Weight at 0 to 3 months                        | 74.24             | kg          | (4)           |
| Weight at 3 to 6 months                        | 141.82            | kg          | (4)           |
| Weight at 6 to 9 months                        | 214.70            | kg          | (4)           |
| Weight at 9 to 12 months                       | 286.52            | kg          | (4)           |
| Weight at 12 to 15 months                      | 354.86            | kg          | (4)           |
| Weight at 15 to 18 months                      | 425.32            | kg          | (4)           |
| Weight at 18 to 21 months                      | 477.63            | kg          | (4)           |
| Weight at 21 to 24 months                      | 524.05            | kg          | (4)           |
| Weight at maturity (2 to 9 years)              | 680.39            | kg          | (4)           |
| Value reduction – Stage 4 animals              | 0.31              | proportion  | (5)           |
| Value reduction – Stage 3 animals <sup>2</sup> | 0.29              | proportion  | Calculated    |
| Value reduction – Stage 2 animals <sup>2</sup> | 0.26              | proportion  | Calculated    |
| Value reduction – Stage 1 animals <sup>2</sup> | 0.15              | proportion  | Calculated    |
| Culling risk – Stage 4 animals                 | 3.20              | ratio       | (6)           |
| Culling risk – Stage 3 animals <sup>3</sup>    | 2.98              | ratio       | Calculated    |
| Culling risk – Stage 2 animals <sup>3</sup>    | 2.69              | ratio       | Calculated    |
| Culling risk – Stage 1 animals <sup>3</sup>    | 1.08              | ratio       | Calculated    |

<sup>1</sup> Light and moderate shedding values based on median CFU count for the range. Heavy shedders at minimum cutoff.

<sup>2</sup> Based on Stage 4 value reduction observed in study. Other values estimated by scaling the Stage 4 value to a truncated cumulative logistic probability distribution (max=0.308, alpha=0.308, beta=0.031).

<sup>3</sup> Based on Stage 4 hazard ratio observed in the study. Other values estimated by scaling the Stage 4 value to a truncated cumulative logistic probability distribution (max=3.200, alpha=3.200, beta=0.320). Stage 1 risk is based on a mean value of 1.00 with a normal distribution and standard deviation of 0.10, truncated with a minimum value of 1.00 to obtain a true mean of 1.08.

<sup>1</sup> Tables S1, S2, and S3 taken from Working Paper *Economic losses due to JD in dairy herds* by Philip Rasmussen, Herman Barkema, Steve Mason, Eugene Beaulieu, and David Hall (2020) - University of Calgary, Dept. Ecosystem and Public Health, Faculty of Veterinary Medicine.

**Table S2 | Region-specific dairy sector characteristics for major dairy-producing regions in order of decreasing 2018 annual production used in Markov chain simulations .**

| Region                    | Annual production ('000 MT) <sup>1</sup> | Annual production (kg/cow) <sup>2</sup> | Dairy cattle ('000 head) <sup>3</sup> | Farm-gate price (USD/100kg) <sup>4</sup> |
|---------------------------|------------------------------------------|-----------------------------------------|---------------------------------------|------------------------------------------|
| European Union (28)       | 166,744                                  | 7,279                                   | 22,906                                | 40.22                                    |
| Germany                   | 33,087                                   | 8,068                                   | 4,101                                 | 40.53                                    |
| France                    | 25,055                                   | 7,058                                   | 3,550                                 | 39.92                                    |
| United Kingdom            | 15,488                                   | 8,243                                   | 1,879                                 | 39.07                                    |
| Poland                    | 14,171                                   | 6,401                                   | 2,214                                 | 37.71                                    |
| Netherlands               | 14,090                                   | 9,079                                   | 1,552                                 | 42.50                                    |
| Italy                     | 12,340                                   | 7,289                                   | 1,693                                 | 44.08                                    |
| Ireland                   | 7,831                                    | 5,720                                   | 1,369                                 | 39.20                                    |
| Spain                     | 7,336                                    | 8,968                                   | 818                                   | 36.83                                    |
| Denmark                   | 5,615                                    | 9,851                                   | 570                                   | 42.41                                    |
| Belgium                   | 4,178                                    | 7,898                                   | 529                                   | 37.96                                    |
| Austria                   | 3,821                                    | 7,169                                   | 533                                   | 38.77                                    |
| Czechia                   | 3,162                                    | 8,808                                   | 359                                   | 39.33                                    |
| Sweden                    | 2,760                                    | 8,818                                   | 313                                   | 40.85                                    |
| Finland                   | 2,398                                    | 9,083                                   | 264                                   | 44.72                                    |
| United States             | 98,688                                   | 10,546                                  | 9,358                                 | 35.86                                    |
| California                | 18,331                                   | 10,572                                  | 1,734                                 | 35.86                                    |
| Wisconsin                 | 13,870                                   | 10,887                                  | 1,274                                 | 35.86                                    |
| Idaho                     | 6,871                                    | 11,283                                  | 609                                   | 35.86                                    |
| New York                  | 6,750                                    | 10,835                                  | 623                                   | 35.86                                    |
| Texas                     | 5,830                                    | 10,856                                  | 537                                   | 35.86                                    |
| Michigan                  | 5,066                                    | 11,947                                  | 424                                   | 35.86                                    |
| Pennsylvania              | 4,838                                    | 9,321                                   | 519                                   | 35.86                                    |
| Minnesota                 | 4,476                                    | 9,881                                   | 453                                   | 35.86                                    |
| New Mexico                | 3,758                                    | 11,388                                  | 330                                   | 35.86                                    |
| Washington                | 3,055                                    | 11,030                                  | 277                                   | 35.86                                    |
| Brazil <sup>5</sup>       | 33,491                                   | 1,963                                   | 17,060                                | 41.71                                    |
| China <sup>5</sup>        | 30,640                                   | 2,563                                   | 11,955                                | 53.87                                    |
| Russia                    | 30,611                                   | 4,492                                   | 6,815                                 | 36.58                                    |
| New Zealand               | 21,947                                   | 4,437                                   | 4,946                                 | 35.72                                    |
| Turkey                    | 20,037                                   | 3,161                                   | 6,338                                 | 40.22                                    |
| Canada                    | 10,228                                   | 10,519                                  | 972                                   | 53.93                                    |
| Québec                    | 3,673                                    | 10,369                                  | 354                                   | 53.11                                    |
| Ontario                   | 3,377                                    | 10,432                                  | 324                                   | 52.72                                    |
| British Columbia          | 906                                      | 10,803                                  | 84                                    | 58.81                                    |
| Alberta                   | 867                                      | 10,965                                  | 79                                    | 55.95                                    |
| Manitoba                  | 448                                      | 10,880                                  | 41                                    | 54.14                                    |
| Saskatchewan              | 329                                      | 11,256                                  | 29                                    | 53.74                                    |
| Nova Scotia               | 226                                      | 10,566                                  | 21                                    | 53.17                                    |
| New Brunswick             | 191                                      | 9,985                                   | 19                                    | 53.59                                    |
| Prince Edward Island      | 151                                      | 10,494                                  | 14                                    | 54.02                                    |
| Newfoundland and Labrador | 64                                       | 10,778                                  | 6                                     | 70.74                                    |
| Australia                 | 9,176                                    | 6,017                                   | 1,525                                 | 34.00                                    |
| Japan                     | 7,290                                    | 8,607                                   | 847                                   | 93.15                                    |

<sup>1</sup> Canadian production values: CDIC - Average Production based on Official - Supervised Records (7). US annual production values: USDA ERS - Dairy data - Milk cows and production by State and region (8). All other regions: CLAL.it - Dairy by Country (9).

<sup>2</sup> Canadian annual per cow production values: CDIC - Average Production based on Official - Supervised Records (7). US production per cow values: USDA ERS - Milk cows and production by State and region (USDA ERS, 2019). All other regions: CLAL.it - Dairy by Country (9).

<sup>3</sup> Canadian cattle values: STATCAN - Table 32-10-0130-01 - Number of cattle, by class and farm type (x 1,000) (10). US cattle values: USDA ERS - Dairy data - Milk cows and production by State and region (8). All other regions: CLAL.it - Dairy by Country (9).

<sup>4</sup> Turkey: 2018 EU-28. Australian price: Australian Dairy Industry in Focus - 2018 (11). Canadian values: CDIC - MI011 - Canadian farm cash receipts from dairying (12). All other regions: CLAL.it - Dairy by Country (9). Converted to 2018 US\$ using IRS.gov - Yearly Average Currency Exchange Rates (13).

<sup>5</sup> 2017 values.

**Table S3 | Region-specific economic variables used in the Monte Carlo simulations of the MAP**

**(*Mycobacterium avium* subsp. *paratuberculosis*) -positive Markov herd model. All variables**

**simulated with a normal distribution and standard deviation of 10% of the mean.**

| Region                    | gdppc <sup>1</sup><br>(USD) | wage <sup>2</sup><br>(USD<br>/hr) | r-c <sup>3</sup><br>(USD/<br>hd) | r-oh <sup>3</sup><br>(USD<br>/hd) | r-bh <sup>3</sup><br>(USD<br>/hd) | r-m <sup>3</sup><br>(USD<br>/hd) | s-12 <sup>4</sup><br>(USD<br>/kg) | s-24 <sup>4</sup><br>(USD<br>/kg) | s-m <sup>4</sup><br>(USD<br>/kg) |
|---------------------------|-----------------------------|-----------------------------------|----------------------------------|-----------------------------------|-----------------------------------|----------------------------------|-----------------------------------|-----------------------------------|----------------------------------|
| European Union            | 39,928                      | 10.08                             | 59.94                            | 375.71                            | 650.80                            | 764.17                           | 2.12                              | 1.69                              | 0.71                             |
| Germany                   | 47,603                      | 12.11                             | 72.01                            | 451.35                            | 781.82                            | 918.02                           | 2.55                              | 2.03                              | 0.85                             |
| France                    | 41,464                      | 10.39                             | 61.78                            | 387.19                            | 670.69                            | 787.52                           | 2.19                              | 1.74                              | 0.73                             |
| United Kingdom            | 42,944                      | 10.53                             | 62.62                            | 392.48                            | 679.86                            | 798.29                           | 2.22                              | 1.76                              | 0.74                             |
| Poland                    | 15,421                      | 3.65                              | 21.71                            | 136.05                            | 235.66                            | 276.71                           | 0.77                              | 0.61                              | 0.26                             |
| Netherlands               | 53,024                      | 14.15                             | 84.11                            | 527.18                            | 913.17                            | 1,072.25                         | 2.98                              | 2.37                              | 0.99                             |
| Italy                     | 34,483                      | 9.54                              | 56.73                            | 355.59                            | 615.94                            | 723.24                           | 2.01                              | 1.60                              | 0.67                             |
| Ireland                   | 78,806                      | 19.39                             | 115.29                           | 722.64                            | 1,251.75                          | 1,469.81                         | 4.08                              | 3.25                              | 1.36                             |
| Spain                     | 30,371                      | 7.02                              | 41.75                            | 261.65                            | 453.24                            | 532.19                           | 1.48                              | 1.18                              | 0.49                             |
| Denmark                   | 61,350                      | 16.33                             | 97.10                            | 608.60                            | 1,054.22                          | 1,237.87                         | 3.44                              | 2.73                              | 1.15                             |
| Belgium                   | 47,519                      | 11.32                             | 67.32                            | 421.97                            | 730.94                            | 858.27                           | 2.39                              | 1.90                              | 0.79                             |
| Austria                   | 51,462                      | 12.53                             | 74.47                            | 466.79                            | 808.56                            | 949.41                           | 2.64                              | 2.10                              | 0.88                             |
| Czechia                   | 23,079                      | 5.70                              | 33.88                            | 212.33                            | 367.79                            | 431.86                           | 1.20                              | 0.95                              | 0.40                             |
| Sweden                    | 54,608                      | 14.00                             | 83.26                            | 521.84                            | 903.92                            | 1,061.39                         | 2.95                              | 2.34                              | 0.98                             |
| Finland                   | 50,152                      | 14.08                             | 83.70                            | 524.64                            | 908.77                            | 1,067.08                         | 2.97                              | 2.36                              | 0.99                             |
| United States             | 62,795                      | 14.14                             | 84.05                            | 526.79                            | 912.50                            | 1,071.46                         | 2.98                              | 2.37                              | 0.99                             |
| California                | 60,359                      | 13.59                             | 80.79                            | 506.36                            | 877.11                            | 1,029.90                         | 2.86                              | 2.27                              | 0.95                             |
| Wisconsin                 | 48,666                      | 10.96                             | 65.14                            | 408.26                            | 707.19                            | 830.38                           | 2.31                              | 1.83                              | 0.77                             |
| Idaho                     | 36,441                      | 8.20                              | 48.77                            | 305.71                            | 529.54                            | 621.79                           | 1.73                              | 1.37                              | 0.58                             |
| New York                  | 65,220                      | 14.68                             | 87.29                            | 547.14                            | 947.74                            | 1,112.84                         | 3.09                              | 2.46                              | 1.03                             |
| Texas                     | 53,737                      | 12.10                             | 71.92                            | 450.80                            | 780.88                            | 916.91                           | 2.55                              | 2.02                              | 0.85                             |
| Michigan                  | 44,201                      | 9.95                              | 59.16                            | 370.81                            | 642.31                            | 754.20                           | 2.10                              | 1.67                              | 0.70                             |
| Pennsylvania              | 51,841                      | 11.67                             | 69.39                            | 434.90                            | 753.33                            | 884.56                           | 2.46                              | 1.95                              | 0.82                             |
| Minnesota                 | 54,805                      | 12.34                             | 73.35                            | 459.76                            | 796.40                            | 935.13                           | 2.60                              | 2.06                              | 0.87                             |
| New Mexico                | 41,619                      | 9.37                              | 55.71                            | 349.15                            | 604.79                            | 710.14                           | 1.97                              | 1.57                              | 0.66                             |
| Washington                | 59,333                      | 13.36                             | 79.41                            | 497.75                            | 862.20                            | 1,012.39                         | 2.81                              | 2.24                              | 0.94                             |
| Brazil                    | 8,921                       | 2.34                              | 13.89                            | 87.04                             | 150.78                            | 177.04                           | 0.49                              | 0.39                              | 0.16                             |
| China                     | 9,771                       | 3.30                              | 19.64                            | 123.13                            | 213.28                            | 250.43                           | 0.70                              | 0.55                              | 0.23                             |
| Russia                    | 11,289                      | 2.59                              | 15.41                            | 96.60                             | 167.34                            | 196.49                           | 0.55                              | 0.43                              | 0.18                             |
| New Zealand               | 41,945                      | 9.41                              | 55.92                            | 350.49                            | 607.12                            | 712.89                           | 1.98                              | 1.57                              | 0.66                             |
| Turkey                    | 9,370                       | 2.37                              | 14.07                            | 88.17                             | 152.73                            | 179.34                           | 0.50                              | 0.40                              | 0.17                             |
| Canada                    | 46,269                      | 15.66                             | 93.13                            | 583.69                            | 1,011.06                          | 1,187.19                         | 3.30                              | 2.62                              | 1.10                             |
| Québec                    | 40,389                      | 13.47                             | 80.06                            | 501.77                            | 869.16                            | 1,020.57                         | 2.84                              | 2.25                              | 0.95                             |
| Ontario                   | 46,167                      | 15.28                             | 90.85                            | 569.43                            | 986.36                            | 1,158.18                         | 3.22                              | 2.56                              | 1.07                             |
| British Columbia          | 45,540                      | 16.81                             | 99.96                            | 626.55                            | 1,085.31                          | 1,274.38                         | 3.54                              | 2.81                              | 1.18                             |
| Alberta                   | 61,816                      | 21.71                             | 129.08                           | 809.03                            | 1,401.40                          | 1,645.53                         | 4.57                              | 3.63                              | 1.52                             |
| Manitoba                  | 41,409                      | 14.08                             | 83.68                            | 524.51                            | 908.55                            | 1,066.82                         | 2.96                              | 2.36                              | 0.99                             |
| Saskatchewan              | 53,487                      | 18.04                             | 107.27                           | 672.37                            | 1,164.68                          | 1,367.57                         | 3.80                              | 3.02                              | 1.27                             |
| Nova Scotia               | 35,641                      | 11.90                             | 70.73                            | 443.34                            | 767.95                            | 901.73                           | 2.51                              | 1.99                              | 0.84                             |
| New Brunswick             | 36,970                      | 12.44                             | 73.94                            | 463.44                            | 802.76                            | 942.60                           | 2.62                              | 2.08                              | 0.87                             |
| Prince Edward Island      | 35,111                      | 11.91                             | 70.79                            | 443.67                            | 768.53                            | 902.41                           | 2.51                              | 1.99                              | 0.84                             |
| Newfoundland and Labrador | 48,761                      | 21.57                             | 128.25                           | 803.86                            | 1,392.44                          | 1,635.01                         | 4.54                              | 3.61                              | 1.51                             |
| Australia                 | 57,374                      | 12.25                             | 72.81                            | 456.34                            | 790.46                            | 928.16                           | 2.58                              | 2.05                              | 0.86                             |
| Japan                     | 39,290                      | 22.98                             | 136.60                           | 856.16                            | 1,483.02                          | 1,741.37                         | 4.84                              | 3.84                              | 1.61                             |

<sup>1</sup> Gross domestic product per capita (gdppc). US GDPPC by state (14) and Canadian GDP by province (15). Converted to US\$ (13). All other regions (16).

<sup>2</sup> Estimated aggregate dairy wage rate (wage). US 2018 (17). All other regions (*i* through *n*) calculated using the following formula:  $wage_i = \frac{wage_{USA} * gdppc_i * farm-gate\ price_i}{farm-gate\ price_{USA} * gdppc_{USA}}$

<sup>3</sup> Calf ("c"), open heifer ("oh"), bred heifer ("bh") and mature cow ("m") replacement ("r") costs. US replacement prices (18). All other regions (*i* through *n*) calculated using the following formula:  $r_i = \frac{r_{USA} * gdppc_i * farm-gate\ price_i}{farm-gate\ price_{USA} * gdppc_{USA}}$

<sup>4</sup> 0-12-month animals ("12"), 12-24-month animals ("24"), and mature cow ("m") salvage ("s") prices. Canadian salvage prices (19). Converted to kg at 50.8023 kg/CWT and converted to US\$ (13). All other regions (*i* through *n*) calculated using the following formula:  $s_i = \frac{s_{CAN} * gdppc_i * farm-gate\ price_i}{farm-gate\ price_{CAN} * gdppc_{CAN}}$

## References – Supplementary Files

1. McAloon CG, Whyte P, More SJ, Green MJ, O'Grady L, Garcia A, Doherty ML. The effect of paratuberculosis on milk yield—A systematic review and meta-analysis. *J. Dairy Sci.* (2016) 99: 1449-1460. doi:10.3168/jds.2015-10156
2. Crossley BM, Zagmutt-Vergara FJ, Fyock TL, Whitlock RH, Gardner IA. Fecal shedding of *Mycobacterium avium* subsp. *paratuberculosis* by dairy cows. *Vet. Microbiol.* (2005) 107: 257-263. doi:10.1016/j.vetmic.2005.01.017
3. Whitlock RH, Wells SJ, Sweeney RW, Van Tiem J. ELISA and fecal culture for paratuberculosis (Johne's disease): sensitivity and specificity of each method. *Vet. Microbiol.* (2000) 77: 387-398. doi:10.1016/S0378-1135(00)00324-2
4. Jones CM, Heinrichs J. Growth Charts for Dairy Heifers: Comparing to a breed standard can indicate if heifer growth is progressing normally. *Penn State Extension* (2017) Available at: <https://extension.psu.edu/growth-charts-for-dairy-heifers> [Accessed January 17, 2020].
5. Kudahl AB, Nielsen SS. Effect of paratuberculosis on slaughter weight and slaughter value of dairy cows. *J. Dairy Sci.* (2009) 92: 4340-4346. doi:10.3168/jds.2009-2039
6. Hendrick SH, Kelton DF, Leslie KE, Lissemore KD, Archambault M, Duffield TF. Effect of paratuberculosis on culling, milk production, and milk quality in dairy herds. *J. Am. Vet. Med. Assoc.* (2005) 227: 1302-1308. doi:10.2460/javma.2005.227.1302
7. CDIC. D037-3 - Average Production by Province. *Canadian Dairy Information Centre* (2019) Available at: <https://aimis-simia-cdic-ccil.agr.gc.ca/rp/index-eng.cfm?action=pR&r=215&pdctc=> [Accessed October 10, 2019].
8. USDA ERS. Dairy data – milk and cow production by State and region. *United States Department of Agriculture - Economic Research Service* (2019) Available at: [https://www.ers.usda.gov/webdocs/DataFiles/48685/milkcowsandprod\\_1\\_.xlsx?v=2695](https://www.ers.usda.gov/webdocs/DataFiles/48685/milkcowsandprod_1_.xlsx?v=2695) [Accessed January 14, 2020].
9. CLAL. Dairy Sector by Country. *CLAL S. R. L.* (2019) Available at: <https://www.clal.it/en/> [Accessed September 15, 2020].
10. STATCAN. Table 32-10-0130-01 Number of cattle, by class and farm type (x 1,000). *Statistics Canada* (2020) Available at: <https://www150.statcan.gc.ca/t1/tbl1/en/tv.action?pid=3210013001> [Accessed September 13, 2020].
11. Dairy Australia. Dairy in Focus - 2018. *Dairy Australia* (2019) Available at: <https://www.dairyaustralia.com.au/publications/australian-dairy-industry-in-focus-2018?id=B81A5CE26AAE4C0F898E8F3BFF0014D9> [Accessed January 26, 2020].
12. CDIC. MI011 - Canadian farm cash receipts from dairying. *Canadian Dairy Information Centre* (2019) Available at: <https://aimis-simia-cdic-ccil.agr.gc.ca/rp/index-eng.cfm?action=pR&r=272&pdctc=> [Accessed September 14, 2020].
13. IRS. Yearly average currency exchange rates. *Internal Revenue Service* (2020) Available at: <https://www.irs.gov/individuals/international-taxpayers/yearly-average-currency-exchange-rates> [Accessed January 13, 2020].
14. BEA. Regional Economic Accounts – SAGDP Tables: Annual GDP by State. *Bureau of Economic Analysis* (2019) Available at: <https://www.bea.gov/data/gdp/gdp-state> [Accessed January 13, 2020].
15. STATCAN. Table 36-10-0222-01 Gross domestic product, expenditure-based, provincial and territorial, annual (x 1,000,000). *Statistics Canada* (2019) Available at: <https://www150.statcan.gc.ca/t1/tbl1/en/tv.action?pid=3610022201> [Accessed January 14, 2020].

16. World Bank. GDP per capita (current US\$). *World Bank* (2020) Available at:  
<https://data.worldbank.org/indicator/NY.GDP.PCAP.CD> [Accessed January 4, 2020].
17. USDA NASS. Farm Labor – 05/30/2019. *United States Department of Agriculture, National Agricultural Statistics Service* (2019) Available at:  
[https://www.nass.usda.gov/Publications/Todays\\_Reports/reports/fmla0519.pdf](https://www.nass.usda.gov/Publications/Todays_Reports/reports/fmla0519.pdf)  
[Accessed January 19, 2020].
18. USDA. National Dairy Comprehensive Report - Monthly - 02/29/2020. *United States Department of Agriculture* (2020) Available at:  
<https://www.ams.usda.gov/mnreports/lsmddairycomp.pdf> [Accessed February 11, 2020].
19. STATCAN. Table 32-10-0077-01 Farm product prices, crops and livestock. *Statistics Canada* (2019) Available at:  
<https://www150.statcan.gc.ca/t1/tbl1/en/tv.action?pid=3210007701> [Accessed January 20, 2020].
